# Supplementary material
Source: PubMed Central journal article supplement (PMC5896595)
Supplement: jsw057_supp.pdf [file jsw057_supp.pdf]

Supplemental Table I. Predictors of Intervention Response

| Model                             | Parameter                | Estimate | Standard Error | t Value | Pr >  t      |
|-----------------------------------|--------------------------|----------|----------------|---------|--------------|
| Each model has a single covariate | Intercept                | 3.47     | 0.78           | 4.44    | 0.000        |
|                                   | Gender Female            | -0.78    | 1.19           | -0.66   | 0.518        |
|                                   | Intercept                | 3.90     | 1.01           | 3.85    | 0.001        |
|                                   | Diagnosis ALL            | -1.15    | 1.24           | -0.93   | 0.361        |
|                                   | Intercept                | 4.23     | 1.16           | 3.63    | 0.001        |
|                                   | Treatment Intensity      | -0.63    | 0.58           | -1.09   | 0.286        |
|                                   | Intercept                | 1.29     | 1.64           | 0.79    | 0.438        |
|                                   | SES                      | 0.05     | 0.04           | 1.21    | 0.237        |
|                                   | Intercept                | 2.85     | 1.17           | 2.43    | 0.022        |
|                                   | Age at Diagnosis         | 0.06     | 0.20           | 0.28    | 0.779        |
|                                   | Intercept                | 3.44     | 1.19           | 2.89    | 0.007        |
|                                   | Time since treatment     | -0.06    | 0.20           | -0.30   | 0.767        |
|                                   | Intercept                | -3.67    | 3.90           | -0.94   | 0.354        |
|                                   | Abbreviated IQ           | 0.06     | 0.04           | 1.76    | 0.089        |
| Best fit model according to AIC   | Intercept                | -8.79    | 6.17           | -1.43   | 0.165        |
|                                   | Cogmed training sessions | 0.46     | 0.24           | 1.94    | 0.062        |
|                                   | Intercept                | -17.40   | 6.99           | -2.49   | 0.019        |
|                                   | Diagnosis ALL            | -1.60    | 1.11           | -1.45   | 0.160        |
| Best fit model according to AIC   | Abbreviated IQ           | 0.07     | 0.03           | 2.20    | <b>0.037</b> |
|                                   | Cogmed training session  | 0.53     | 0.22           | 2.39    | <b>0.025</b> |

ALL= acute lymphoblastic leukemia. AIC= Akaike Information Criterion, a model goodness-of-fit criterion. No covariates significantly predicted intervention response when considered independently. In the best fitting model, higher abbreviated IQ and more Cogmed training sessions were predictive of better intervention response.

Supplemental Table II. Linear Mixed Effects Modeling without Immediate Post Time Point

|                                                    | Intervention vs<br>Control at 6 Months | Standard Error | t Value | Pr >  t      |
|----------------------------------------------------|----------------------------------------|----------------|---------|--------------|
| WISC-IV – Digit Span Forward <sup>‡</sup>          | 1.34                                   | 0.76           | 1.76    | 0.084        |
| WISC-IV – Digit Span Backward <sup>‡</sup>         | 1.14                                   | 0.80           | 1.43    | 0.159        |
| WISC-IV – Letter Number Sequencing <sup>‡</sup>    | <b>1.38</b>                            | 0.66           | 2.10    | <b>0.040</b> |
| WISC-IV – Working Memory Index <sup>§</sup>        | <b>7.96</b>                            | 3.38           | 2.35    | <b>0.022</b> |
| WISC-IV – Spatial Span Forward <sup>‡</sup>        | <b>1.60</b>                            | 0.80           | 2.01    | <b>0.049</b> |
| WISC-IV – Spatial Span Backward <sup>‡</sup>       | <b>1.79</b>                            | 0.71           | 2.51    | <b>0.015</b> |
| Conners 3 Parent – Inattention <sup>¶</sup>        | -3.89                                  | 3.52           | -1.10   | 0.274        |
| Conners 3 Parent – Executive Function <sup>¶</sup> | -2.47                                  | 3.42           | -0.72   | 0.474        |
| BRIEF – Working Memory <sup>¶</sup>                | 0.45                                   | 3.22           | 0.14    | 0.889        |
| BRIEF – Metacognitive Index <sup>¶</sup>           | -0.47                                  | 2.91           | -0.16   | 0.873        |
| CPT-II – Omissions <sup>¶</sup>                    | -1.07                                  | 2.77           | -0.39   | 0.702        |
| CPT-II – Hit RT <sup>¶</sup>                       | -1.93                                  | 2.57           | -0.75   | 0.455        |
| WJ-III – Reading Fluency <sup>§</sup>              | 6.65                                   | 4.54           | 1.46    | 0.149        |
| WJ-III – Math Fluency <sup>§</sup>                 | -0.85                                  | 3.63           | -0.23   | 0.815        |

<sup>‡</sup>Scaled Score: mean = 10, standard deviation = 3; higher score is better. <sup>§</sup>Standard Score: mean = 100, standard deviation = 15; higher score is better. <sup>¶</sup>T Score: mean = 50, standard deviation = 10; higher score is worse. WISC-IV = Wechsler Intelligence Scale for Children – 4th Edition. BRIEF = Behavior Rating Inventory of Executive Function. CPT-II = Conners' Continuous Performance Test – 2nd Edition. Hit RT = Hit Reaction Time. WJ-III = Woodcock Johnson Tests of Achievement – 3rd Edition. Results of the linear mixed effect modeling directly comparing groups at six months indicates greater improvements in the intervention group on performance measures of attention and working memory.

Supplementary Figure 1.

**A. WISC-IV Spatial Span Backward**

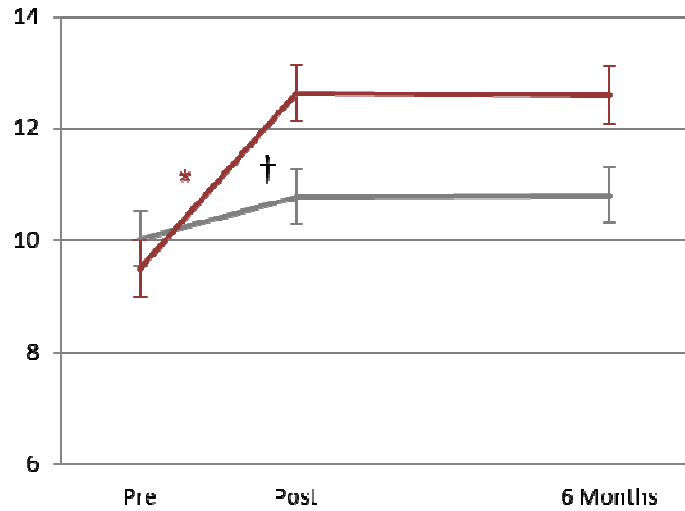

**B. WISC-IV Working Memory Index**

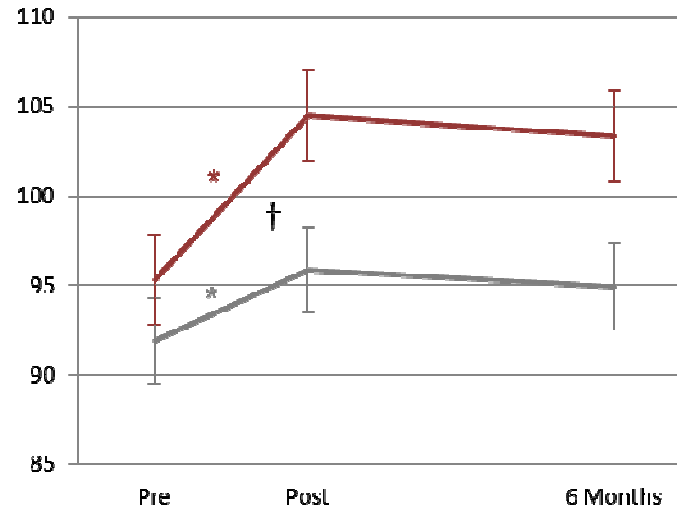

**C. Conners 3 Parent Executive Function**

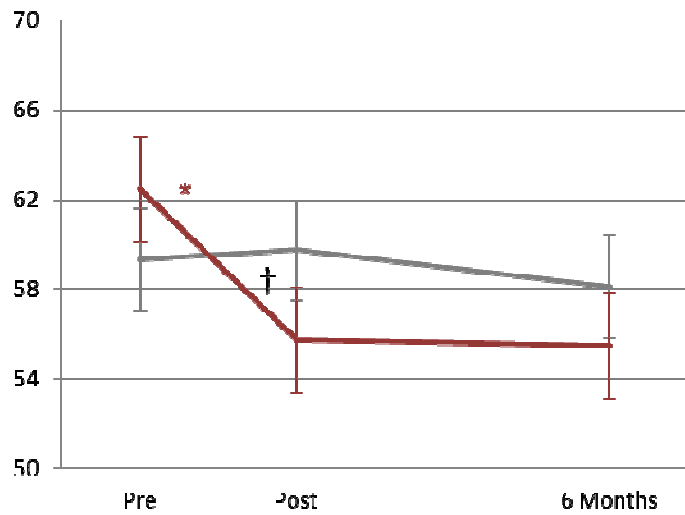

**D. Conners 3 Parent - Inattention**

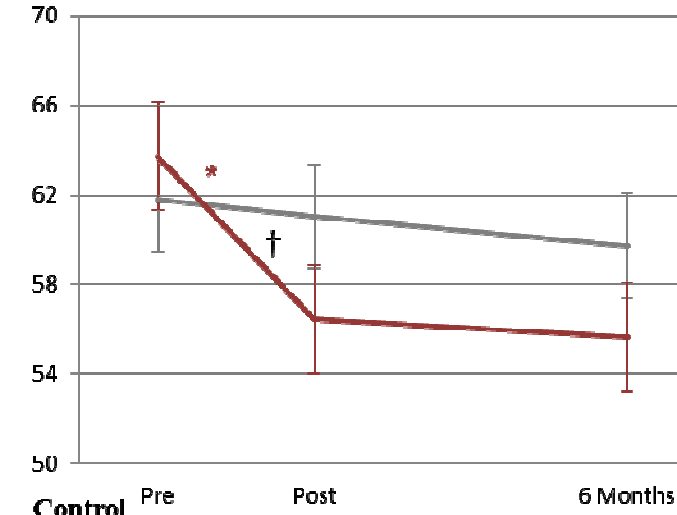

— Control  
— Intervention
